# Supplementary material for: Hydrothermal Co-Liquefaction of Food and Plastic Waste for Biocrude Production
Source: MDPI journal article supplement (doi:10.3390/en17092098), 2024-04-27
Supplement: s1 [file s1]

# Co-Hydrothermal Liquefaction of Food and Plastic Waste for Biocrude Production

Silvan Feuerbach<sup>1</sup>, Saqib Sohail Toor<sup>1</sup>, Paula Alexandra Costa<sup>2</sup>, Filipe Paradelas<sup>2</sup>, Paula A.A.S. Marques<sup>2</sup>, Daniele Castello<sup>\*1</sup>

<sup>1</sup> AAU Energy, Aalborg University, Pontoppidanstræde 111, 9220 Aalborg, Denmark.

<sup>2</sup> LNEG - Laboratório Nacional de Energia e Geologia Estrada do Paço do Lumiar, 22, 1649-038 Lisboa, Portugal.

\* Correspondence: dac@energy.aau.dk; Tel.: +45-99408016

## Supplementary Information

Table S1: Comparison of measured and calculated heating values.

| Nr.<br>-            | HHV <sub>Biooil</sub><br>MJ/kg | HHV <sub>Biooil</sub><br>MJ/kg | Difference<br>MJ/kg |
|---------------------|--------------------------------|--------------------------------|---------------------|
| Initial Experiments | T2                             | 34,95                          |                     |
|                     | T7                             | 34,94                          | 35,40               |
|                     | T8                             | 35,71                          | 36,47               |
|                     | T9                             |                                | 22,86               |
|                     | T10                            |                                | 41,92               |
|                     | T11                            | 35,52                          | 36,06               |
|                     | T12                            | 32,33                          | 36,12               |
|                     | T13                            | 35,74                          | 36,57               |
| Cube design         | 1                              | 37,25                          | 36,67               |
|                     | 2                              | 35,2                           | 34,60               |
|                     | 3                              | 36,05                          | 36,48               |
|                     | 4                              | 35,96                          | 35,63               |
|                     | 5                              | 35,79                          | 33,73               |
|                     | 6                              | 36,52                          | 36,22               |
|                     | 7                              | 36,29                          | 36,07               |
|                     | 8                              | 36,56                          | 36,00               |
|                     | 9                              | 37,6                           | 36,75               |
|                     | 10                             | 36,8                           | 36,25               |
| Face centers        | 11                             | 35,63                          | 35,05               |
|                     | 12                             | 36,84                          | 36,14               |
|                     | 13                             | 37,21                          | 36,28               |
|                     | 14                             | 36,63                          | 36,28               |
|                     | 15                             | 34,46                          | 34,04               |
| Sum                 |                                |                                | 0,11                |
| Std. dev            |                                |                                | 1,14                |

Table S2: Analysis of Variance for biooil yield model.

Call:

*rsm(formula = yield ~ FO(x1, x2, x3), data = design.full\_exp\_design\_coded)*

|                   | Estimate | Std.<br>Error  | t value  | Pr(> t )  |           |
|-------------------|----------|----------------|----------|-----------|-----------|
| (Intercept)       | 29.11000 | 0.94555        | 30.7862  | 1.559e-13 | ***       |
| x1                | 1.31500  | 1.23285        | 1.0666   | 0.3055    |           |
| x2                | 1.72000  | 1.23285        | 1.3951   | 0.1864    |           |
| x3                | 17.22200 | 1.23285        | 13.9693  | 3.312e-09 | ***       |
| Significant codes | 0 '***'  | 0.001<br>'***' | 0.01 '*' | 0.05 '.'  | 0.1 ' ' 1 |

Multiple R-squared: 0.9385, Adjusted R-squared: 0.9243

F-statistic: 66.07 on 3 and 13 DF, p-value: 3.987e-08

#### Analysis of Variance Table

| Response: yield | Df | Sum Sq  | Mean<br>Sq | F value | Pr(>F)    |
|-----------------|----|---------|------------|---------|-----------|
| FO(x1,x2,x3)    | 3  | 3012.85 | 1004.28    | 66.0747 | 3.987e-08 |
| Residuals       | 13 | 197.59  | 15.20      |         |           |
| Lack of fit     | 11 | 192.06  | 17.46      | 6.3198  | 0.1444    |
| Pure error      | 2  | 5.53    | 2.76       |         |           |

Table S3: GC results of experimental trials.

| Nr.<br>- | Hydrogen<br>wt% | Oxygen<br>wt% | Nitrogen<br>wt% | CO <sub>2</sub><br>wt% | Methane<br>wt% | CO<br>wt% | Ethylene<br>wt% | Ethane<br>wt% | Propene<br>wt% | Propane<br>wt% | isoButane<br>wt% | Butene<br>wt% | nButane<br>wt% |
|----------|-----------------|---------------|-----------------|------------------------|----------------|-----------|-----------------|---------------|----------------|----------------|------------------|---------------|----------------|
| T2       | 0               | 0             | 0               | 95,43                  | 0,36           | 0         | 0,38            | 0,00          | 0,54           | 1,63           | 0,32             | 0,88          | 0,47           |
| T4       | 0               | 0             | 0               | 96,37                  | 0,71           | 0         | 0,27            | 0,00          | 0,51           | 0,89           | 0,16             | 0,74          | 0,34           |
| T6       | 0               | 0             | 0               | 94,27                  | 1,12           | 0         | 0,33            | 0,00          | 0,60           | 1,73           | 0,43             | 0,97          | 0,55           |
| T7       | 0               | 0             | 0               | 92,17                  | 2,70           | 0         | 0,63            | 0,16          | 0,77           | 1,57           | 0,25             | 1,08          | 0,67           |
| T8       | 0               | 0             | 0               | 94,69                  | 1,59           | 0         | 0,43            | 0,11          | 0,58           | 1,12           | 0,20             | 0,81          | 0,49           |
| T9       | 0               | 0             | 0               | 95,48                  | 1,07           | 0         | 0,28            | 0,00          | 0,56           | 1,09           | 0,21             | 0,87          | 0,44           |
| T10      | 0               | 0             | 0               | 85,58                  | 2,13           | 0         | 0,71            | 0,74          | 1,85           | 3,68           | 0,48             | 1,94          | 2,87           |
| T11      | 0               | 0             | 0               | 85,22                  | 1,65           | 0         | 0,69            | 0,83          | 1,94           | 3,94           | 0,42             | 1,91          | 3,41           |
| T12      | 0,04            | 0             | 0               | 94,99                  | 1,86           | 0         | 0,30            | 0,34          | 0,61           | 0,63           | 0,08             | 0,69          | 0,46           |
| T13      | 0               | 0             | 0               | 92,68                  | 3,00           | 0         | 0,38            | 0,49          | 0,86           | 1,10           | 0,22             | 0,72          | 0,55           |
| 1        | 0               | 0             | 0               | 90,04                  | 1,75           | 0         | 0,51            | 0,00          | 1,12           | 2,89           | 0,70             | 1,55          | 1,44           |
| 2        | 0               | 0             | 0               | 92,09                  | 2,70           | 0         | 0,53            | 0,27          | 0,72           | 1,58           | 0,36             | 0,89          | 0,85           |
| 3        | 0               | 0             | 0               | 92,75                  | 1,05           | 0         | 0,00            | 0,00          | 2,82           | 0,62           | 0,54             | 1,31          | 0,91           |
| 6        | 0               | 0             | 0               | 93,31                  | 0,67           | 0         | 0,42            | 0,00          | 2,74           | 0,46           | 0,54             | 1,11          | 0,74           |
| 7        | 0               | 0             | 0               | 94,23                  | 0,66           | 0         | 0,32            | 0,00          | 2,32           | 0,37           | 0,45             | 1,02          | 0,63           |
| 9        | 0               | 0             | 0               | 90,26                  | 1,10           | 0         | 0,47            | 0,00          | 0,72           | 4,49           | 0,97             | 1,00          | 0,98           |
| 10       | 0               | 0             | 0               | 92,89                  | 2,93           | 0         | 0,45            | 0,40          | 1,49           | 0,66           | 0,18             | 0,28          | 0,72           |
| 11       | 0               | 0             | 0               | 93,32                  | 2,49           | 0         | 0,47            | 0,23          | 1,56           | 0,55           | 0,20             | 0,28          | 0,92           |
| 12       | 0               | 0             | 0               | 92,51                  | 2,24           | 0         | 0,49            | 0,00          | 1,99           | 0,60           | 0,29             | 1,16          | 0,72           |
| 13       | 0               | 0             | 0               | 93,93                  | 2,38           | 0         | 0,39            | 0,11          | 1,30           | 0,43           | 0,17             | 0,80          | 0,49           |
| 14       | 0,05            | 0             | 0               | 88,32                  | 5,84           | 0         | 0,74            | 0,63          | 1,83           | 0,86           | 0,19             | 0,34          | 1,20           |
| 15       | 0               | 0             | 0               | 88,87                  | 3,95           | 0         | 0,78            | 0,15          | 2,60           | 0,80           | 0,36             | 1,58          | 0,91           |

Table S4: HPLC results of experimental trials.

| Nr.<br>- | Temp.<br>°C | Time<br>min | x <sub>B</sub><br>wt.-frac | Cellobiose<br>g/l | Glucose<br>g/l | Xylose<br>g/l | Arabinose<br>g/l | Succinic<br>Acid<br>g/l | Lactic<br>Acid<br>g/l | Glycerol<br>g/l | Formic<br>Acid<br>g/l | Acetic<br>Acid<br>g/l | Propionic<br>Acid<br>g/l | Isobutyric<br>Acid<br>g/l | Butyric<br>Acid<br>g/l | Total<br>g/l |
|----------|-------------|-------------|----------------------------|-------------------|----------------|---------------|------------------|-------------------------|-----------------------|-----------------|-----------------------|-----------------------|--------------------------|---------------------------|------------------------|--------------|
| T9       | 330         | 30          | 0                          |                   |                |               |                  |                         |                       |                 | 5.25                  | 0.07                  |                          |                           |                        | 5.32         |
| T10      | 370         | 30          | 0                          |                   | 0.13           |               |                  |                         |                       |                 | 7.18                  | 0.77                  |                          |                           |                        | 8.09         |
| T12      | 370         | 30          | 1                          |                   |                | 0.12          | 0.12             | 0.38                    | 0.86                  | 6.77            | 0.33                  | 5.52                  | 1.32                     |                           |                        | 15.44        |
| 1        | 370         | 60          | 0.5                        |                   |                | 0.30          |                  | 0.14                    | 0.11                  |                 | 5.93                  | 2.41                  | 0.58                     | 0.14                      |                        | 9.62         |
| 2        | 290         | 60          | 0.5                        | 0.35              | 0.29           | 0.21          | 0.77             | 0.48                    | 4.16                  | 3.87            | 1.83                  | 0.98                  | 2.79                     | 1.05                      |                        | 16.78        |
| 3        | 370         | 0           | 0.5                        | 0.20              | 0.19           |               | 0.32             | 0.24                    | 0.98                  | 3.34            | 1.66                  | 1.24                  | 0.39                     | 0.13                      |                        | 8.69         |
| 4        | 330         | 30          | 0.75                       |                   | 0.28           | 0.13          | 0.42             | 0.32                    | 1.58                  | 5.49            | 1.51                  | 2.60                  | 2.58                     | 0.15                      | 0.21                   | 15.28        |
| 5        | 290         | 0           | 0.5                        | 0.37              | 0.39           | 0.25          | 1.35             | 0.54                    | 5.33                  | 1.03            | 2.32                  | 0.90                  | 4.31                     | 1.04                      | 0.19                   | 18.01        |
| 6        | 290         | 60          | 1                          |                   | 0.37           | 0.26          | 1.13             | 0.69                    | 8.00                  | 8.18            | 0.33                  | 8.65                  | 7.50                     | 0.58                      | 0.67                   | 36.38        |
| 7        | 290         | 0           | 1                          | 0.14              | 0.40           | 0.71          | 1.83             | 0.83                    | 9.04                  | 2.03            | 2.65                  | 2.33                  | 1.22                     | 1.98                      | 0.55                   | 23.69        |
| 8        | 370         | 0           | 1                          |                   | 0.35           | 0.15          | 0.67             | 0.43                    | 2.07                  | 6.83            | 0.33                  | 3.32                  | 3.69                     | 0.51                      | 0.46                   | 18.79        |
| 9        | 370         | 60          | 1                          |                   | 0.14           |               |                  | 0.23                    |                       | 4.63            | 0.33                  | 4.49                  | 1.02                     | 0.35                      | 0.26                   | 11.45        |
| 10       | 330         | 30          | 0.75                       | 0.11              | 0.36           | 0.31          | 0.63             | 0.56                    | 1.92                  | 5.32            | 3.66                  | 3.39                  | 3.12                     | 0.61                      | 0.60                   | 20.59        |
| 11       | 290         | 30          | 0.75                       | 0.45              | 0.45           | 0.29          | 1.18             | 0.61                    | 6.39                  | 5.77            | 0.66                  | 1.42                  | 5.20                     | 0.46                      |                        | 22.89        |
| 12       | 330         | 60          | 0.75                       | 0.02              | 0.24           |               | 0.26             | 0.32                    | 0.45                  | 4.80            | 0.33                  | 2.37                  | 1.71                     | 0.21                      | 0.17                   | 10.87        |
| 13       | 370         | 30          | 0.75                       | 0.30              | 0.27           | 0.10          |                  | 0.23                    | 0.28                  | 4.13            | 0.33                  | 2.72                  | 0.70                     | 0.15                      | 0.10                   | 9.32         |
| 14       | 330         | 30          | 0.75                       |                   | 0.46           | 0.24          | 0.65             | 0.46                    | 1.70                  | 5.72            | 0.47                  | 2.90                  | 2.63                     | 0.18                      | 2.35                   | 17.75        |
| 15       | 330         | 0           | 0.75                       | 0.32              | 0.30           | 0.19          | 0.93             | 0.46                    | 8.49                  | 3.62            | 0.59                  | 1.31                  | 4.34                     | 0.52                      |                        | 21.08        |
| 16       | 330         | 30          | 0.5                        |                   | 0.16           |               | 0.34             | 0.30                    | 1.40                  | 3.88            | 2.08                  | 1.53                  | 0.40                     | 0.15                      | 0.15                   | 10.40        |
| 17       | 330         | 30          | 1                          |                   | 0.45           | 0.35          | 0.76             | 0.55                    |                       | 7.55            | 0.48                  | 3.66                  | 0.29                     |                           |                        | 14.08        |
